# Supplementary material for: Exercise Training as a Treatment for Cardiometabolic Risk in Sedentary Adults: Are Physical Activity Guidelines the Best Way to Improve Cardiometabolic Health? The FIT-AGEING Randomized Controlled Trial
Source: PubMed Central journal article supplement (PMC6947226; doi:10.3390/jcm8122097), 2019-12-01
Supplement: jcm-08-02097-s001.pdf [file jcm-08-02097-s001.pdf]

Supplementary Table S1. CONSORT 2010 checklist of information to include when reporting a randomised trial

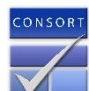

## CONSORT 2010 checklist of information to include when reporting a randomised trial\*

| Section/Topic             | Item No | Checklist item                                                                                                                        | Reported on page No |
|---------------------------|---------|---------------------------------------------------------------------------------------------------------------------------------------|---------------------|
| <b>Title and abstract</b> |         |                                                                                                                                       |                     |
|                           | 1a      | Identification as a randomised trial in the title                                                                                     | 1                   |
|                           | 1b      | Structured summary of trial design, methods, results, and conclusions (for specific guidance see CONSORT for abstracts)               | 2                   |
| <b>Introduction</b>       |         |                                                                                                                                       |                     |
| Background and objectives |         |                                                                                                                                       |                     |
|                           | 2a      | Scientific background and explanation of rationale                                                                                    | 4-5                 |
|                           | 2b      | Specific objectives or hypotheses                                                                                                     | 5                   |
| <b>Methods</b>            |         |                                                                                                                                       |                     |
| Trial design              |         |                                                                                                                                       |                     |
|                           | 3a      | Description of trial design (such as parallel, factorial) including allocation ratio                                                  | 6                   |
|                           | 3b      | Important changes to methods after trial commencement (such as eligibility criteria), with reasons                                    | 6-8                 |
| Participants              |         |                                                                                                                                       |                     |
|                           | 4a      | Eligibility criteria for participants                                                                                                 | 6                   |
|                           | 4b      | Settings and locations where the data were collected                                                                                  | 6-8                 |
| Interventions             |         |                                                                                                                                       |                     |
|                           | 5       | The interventions for each group with sufficient details to allow replication, including how and when they were actually administered | 6-8                 |
| Outcomes                  |         |                                                                                                                                       |                     |
|                           | 6a      | Completely defined pre-specified primary and secondary outcome measures, including how and when they were assessed                    | 8-10                |
|                           | 6b      | Any changes to trial outcomes after the trial commenced, with reasons                                                                 | Not applicable      |
| Sample size               |         |                                                                                                                                       |                     |
|                           | 7a      | How sample size was determined                                                                                                        | 10-11               |
|                           | 7b      | When applicable, explanation of any interim analyses and stopping guidelines                                                          | 10-12               |
| Randomisation:            |         |                                                                                                                                       |                     |

|                                                      |     |                                                                                                                                                                                             |                |
|------------------------------------------------------|-----|---------------------------------------------------------------------------------------------------------------------------------------------------------------------------------------------|----------------|
| Sequence generation                                  | 8a  | Method used to generate the random allocation sequence                                                                                                                                      | 6              |
|                                                      | 8b  | Type of randomisation; details of any restriction (such as blocking and block size)                                                                                                         | 6              |
| Allocation concealment mechanism                     | 9   | Mechanism used to implement the random allocation sequence (such as sequentially numbered containers), describing any steps taken to conceal the sequence until interventions were assigned | 6              |
| Implementation                                       | 10  | Who generated the random allocation sequence, who enrolled participants, and who assigned participants to interventions                                                                     | 6-8            |
| Blinding                                             | 11a | If done, who was blinded after assignment to interventions (for example, participants, care providers, those assessing outcomes) and how                                                    | 6-8            |
|                                                      | 11b | If relevant, description of the similarity of interventions                                                                                                                                 | 6-8            |
| Statistical methods                                  | 12a | Statistical methods used to compare groups for primary and secondary outcomes                                                                                                               | 10-12          |
|                                                      | 12b | Methods for additional analyses, such as subgroup analyses and adjusted analyses                                                                                                            | 10-12          |
| <b>Results</b>                                       |     |                                                                                                                                                                                             |                |
| Participant flow (a diagram is strongly recommended) | 13a | For each group, the numbers of participants who were randomly assigned, received intended treatment, and were analysed for the primary outcome                                              | 13             |
|                                                      | 13b | For each group, losses and exclusions after randomisation, together with reasons                                                                                                            | 13             |
| Recruitment                                          | 14a | Dates defining the periods of recruitment and follow-up                                                                                                                                     | 7              |
|                                                      | 14b | Why the trial ended or was stopped                                                                                                                                                          | Not applicable |
| Baseline data                                        | 15  | A table showing baseline demographic and clinical characteristics for each group                                                                                                            | 13             |
| Numbers analysed                                     | 16  | For each group, number of participants (denominator) included in each analysis and whether the analysis was by original assigned groups                                                     | 13             |
| Outcomes and estimation                              | 17a | For each primary and secondary outcome, results for each group, and the estimated effect size and its precision (such as 95% confidence interval)                                           | 13-15          |
|                                                      | 17b | For binary outcomes, presentation of both absolute and relative effect sizes is recommended                                                                                                 | 13-15          |
| Ancillary analyses                                   | 18  | Results of any other analyses performed, including subgroup analyses and adjusted analyses, distinguishing pre-specified from exploratory                                                   | 13-15          |

|                          |    |                                                                                                                  |       |
|--------------------------|----|------------------------------------------------------------------------------------------------------------------|-------|
| Harms                    | 19 | All-important harms or unintended effects in each group (for specific guidance see CONSORT for harms)            | 13-15 |
| <b>Discussion</b>        |    |                                                                                                                  |       |
| Limitations              | 20 | Trial limitations, addressing sources of potential bias, imprecision, and, if relevant, multiplicity of analyses | 19    |
| Generalisability         | 21 | Generalisability (external validity, applicability) of the trial findings                                        | 16-20 |
| Interpretation           | 22 | Interpretation consistent with results, balancing benefits and harms, and considering other relevant evidence    | 16-20 |
| <b>Other information</b> |    |                                                                                                                  |       |
| Registration             | 23 | Registration number and name of trial registry                                                                   | 6     |
| Protocol                 | 24 | Where the full trial protocol can be accessed, if available                                                      | 6     |
| Funding                  | 25 | Sources of funding and other support (such as supply of drugs), role of funders                                  | 21    |

\*We strongly recommend reading this statement in conjunction with the CONSORT 2010 Explanation and Elaboration for important clarifications on all the items. If relevant, we also recommend reading CONSORT extensions for cluster randomised trials, non-inferiority and equivalence trials, non-pharmacological treatments, herbal interventions, and pragmatic trials. Additional extensions are forthcoming: for those and for up to date references relevant to this checklist, see [www.consort-statement.org](http://www.consort-statement.org).

**Supplementary Table S2. CERT checklist.**

|                                  | Item | Checklist Item                                                                     | Identification |
|----------------------------------|------|------------------------------------------------------------------------------------|----------------|
| <b>WHAT: materials</b>           | 1    | Detailed description of the type of exercise equipment                             | 6-8            |
| <b>WHO: provider</b>             | 2    | Detailed description of the qualifications, expertise and/or training              | 8              |
| <b>HOW: delivery</b>             | 3    | Describe whether exercises are performed individually or in a group                | 7-8            |
|                                  | 4    | Describe whether exercises are supervised or unsupervised; how they are delivered  | 8              |
|                                  | 5    | Detailed description of how adherence to exercise is measured and reported         | 6-8            |
|                                  | 6    | Detailed description of motivation strategies                                      | 6-8            |
|                                  | 7a   | Detailed description of the decision rule (s) for determining exercise progression | 6-8            |
|                                  | 7b   | Detailed description of how the exercise program was progressed                    | 6-8            |
|                                  | 8    | Detailed description of each exercise to enable replication                        | 7-8            |
|                                  | 9    | Detailed description of any home programme component                               | Not applicable |
|                                  | 10   | Describe whether there are any non-exercise components                             | 6              |
|                                  | 11   | Describe the type and number of adverse events that occur during exercise          | Not applicable |
| <b>WHERE: location</b>           | 12   | Describe the setting in which the exercises are performed                          | 6-8            |
| <b>WHEN, HOW MUCH: dosage</b>    | 13   | Detailed description of the exercise intervention                                  | 7-8            |
| <b>TAILORING: what, how</b>      | 14a  | Describe whether the exercises are generic (one size fits all) or tailored         | 7-8            |
|                                  | 14b  | Detailed description of how exercises are tailored to the individual               | 7-8            |
|                                  | 15   | Describe the decision rule for determining the starting level                      | 7-8            |
| <b>HOW WELL: planned, actual</b> | 16a  | Describe how adherence or fidelity is assessed/measured                            | 6-8            |
|                                  | 16b  | Describe the extent to which the intervention was delivered as planned             | 6-8            |

**Supplementary Table S3.** Changes in anthropometric variables, blood pressure, glucose and lipid metabolism, cardiometabolic risk score, and liver function adjusted for baseline values and sex (Model 1), and adjusted for baseline values and age (Model 2).

|                                      | Analysis of covariance |                  |
|--------------------------------------|------------------------|------------------|
|                                      | P value                |                  |
|                                      | Model 1                | Model 2          |
| <i>Anthropometry</i>                 |                        |                  |
| Body mass index (kg/m <sup>2</sup> ) | <b>0.013</b>           | <b>0.005</b>     |
| Waist circumference (cm)             | <b>&lt;0.001</b>       | <b>&lt;0.001</b> |
| <i>Blood pressure</i>                |                        |                  |
| Systolic blood pressure (mm Hg)      | <b>&lt;0.001</b>       | <b>&lt;0.001</b> |
| Diastolic blood pressure (mm Hg)     | <b>&lt;0.001</b>       | <b>&lt;0.001</b> |
| Mean blood pressure (mm Hg)          | <b>&lt;0.001</b>       | <b>&lt;0.001</b> |
| <i>Glucose metabolism</i>            |                        |                  |
| Plasma glucose (mg/dL)               | 0.691                  | 0.671            |
| Plasma insulin (UI/mL)               | <b>&lt;0.001</b>       | <b>&lt;0.001</b> |
| Insulin glucose ratio                | <b>0.001</b>           | <b>0.001</b>     |
| QUICKI                               | <b>0.005</b>           | <b>0.008</b>     |
| HOMA                                 | <b>&lt;0.001</b>       | <b>&lt;0.001</b> |
| <i>Lipid metabolism</i>              |                        |                  |
| Total cholesterol (mg/dL)            | 0.116                  | 0.079            |
| HDL-C (mg/dL)                        | 0.623                  | 0.708            |
| LDL-C (mg/dL)                        | <b>0.024</b>           | <b>0.020</b>     |
| Triglycerides (mg/dL)                | 0.097                  | 0.264            |
| LDL-C/HDL-C                          | 0.368                  | 0.421            |
| Triglycerides/HDL-C                  | 0.310                  | 0.425            |
| <i>Cardiometabolic risk score</i>    |                        |                  |
|                                      | <b>0.002</b>           | <b>0.003</b>     |
| <i>Liver function</i>                |                        |                  |
| ALT (IU/L)                           | 0.619                  | 0.633            |
| γ-GT (IU/L)                          | 0.575                  | 0.578            |
| Fatty liver index                    | 0.282                  | 0.364            |

Abbreviations: QUICKI - quantitative insulin sensitivity check index; HOMA - homeostasis model assessment index; HDL-C - high-density lipoprotein cholesterol; LDL-C -low-density lipoprotein cholesterol; ALT - alanine transaminase, γ-GT - γ-glutamyl transferase.

**Supplementary Table S4.** Sensitivity (intention to treat) analyses: baseline-observation carried forward imputation assessing the effects of a 12-week intervention program on anthropometric variables, blood pressure, glucose and lipid metabolism, cardiometabolic risk, and liver function, adjusted by baseline values and sex (Model 1), and adjusted by baseline values and age (Model 2).

|                                      | ANCOVA           |                  |
|--------------------------------------|------------------|------------------|
|                                      | P value          |                  |
|                                      | Model 1          | Model 2          |
| <i>Anthropometry</i>                 |                  |                  |
| Body mass index (kg/m <sup>2</sup> ) | <b>0.010</b>     | <b>0.004</b>     |
| Waist circumference (cm)             | <b>&lt;0.001</b> | <b>&lt;0.001</b> |
| <i>Blood pressure</i>                |                  |                  |
| Systolic blood pressure (mm Hg)      | <b>&lt;0.001</b> | <b>&lt;0.001</b> |
| Diastolic blood pressure (mm Hg)     | <b>&lt;0.001</b> | <b>&lt;0.001</b> |
| Mean blood pressure (mm Hg)          | <b>&lt;0.001</b> | <b>&lt;0.001</b> |
| <i>Glucose metabolism</i>            |                  |                  |
| Plasma glucose (mg/dL)               | 0.654            | 0.683            |
| Plasma insulin (UI/mL)               | <b>&lt;0.001</b> | <b>0.001</b>     |
| Insulin glucose ratio                | <b>&lt;0.001</b> | <b>0.001</b>     |
| QUICKI                               | <b>0.003</b>     | <b>0.005</b>     |
| HOMA                                 | <b>&lt;0.001</b> | <b>&lt;0.001</b> |
| <i>Lipid metabolism</i>              |                  |                  |
| Total cholesterol (mg/dL)            | <b>0.116</b>     | <b>0.079</b>     |
| HDL-C (mg/dL)                        | 0.623            | 0.708            |
| LDL-C (mg/dL)                        | <b>0.024</b>     | <b>0.020</b>     |
| Triglycerides (mg/dL)                | 0.190            | 0.264            |
| LDL-C/HDL-C                          | 0.396            | 0.421            |
| Triglycerides/HDL-C                  | 0.310            | 0.425            |
| <i>Cardiometabolic risk score</i>    | <b>0.002</b>     | <b>0.003</b>     |
| <i>Liver function</i>                |                  |                  |
| ALT (IU/L)                           | 0.613            | 0.645            |
| γ-GT (IU/L)                          | 0.532            | 0.538            |
| Fatty liver index                    | 0.282            | 0.364            |

Abbreviations: QUICKI - quantitative insulin sensitivity check index; HOMA - homeostasis model assessment index; HDL-C - high-density lipoprotein cholesterol; LDL-C - low-density lipoprotein cholesterol; ALT - alanine transaminase, γ-GT - γ-glutamyl transferase.

**Supplementary Table S5.** Sensitivity analysis: baseline-observation carried forward imputation assessing the effects of a 12-week intervention program on anthropometric variables, blood pressure, glucose and lipid metabolism, and liver function.

| Change from Baseline at week 12      | Intervention                       |                                |                                 |                                     | F             | P value          | $\eta^2$     |
|--------------------------------------|------------------------------------|--------------------------------|---------------------------------|-------------------------------------|---------------|------------------|--------------|
|                                      | Control (n=17)<br>Mean change (SD) | PAR (n=17)<br>Mean change (SD) | HIIT (n=18)<br>Mean change (SD) | HIIT+EMS (n=19)<br>Mean change (SD) |               |                  |              |
| <i>Anthropometry</i>                 |                                    |                                |                                 |                                     |               |                  |              |
| Body mass index (kg/m <sup>2</sup> ) | -0.15 (0.32)                       | -0.51 (0.65) <sup>ab</sup>     | -0.06 (0.53) <sup>a</sup>       | -0.20 (0.51) <sup>b</sup>           | <b>4.184</b>  | <b>0.009</b>     | <b>0.160</b> |
| Waist circumference (cm)             | -0.13 (1.91) <sup>ab</sup>         | -1.90 (3.45) <sup>c</sup>      | -4.53 (2.54) <sup>ac</sup>      | -4.00 (2.38) <sup>b</sup>           | <b>9.318</b>  | <b>&lt;0.001</b> | <b>0.298</b> |
| <i>Blood pressure</i>                |                                    |                                |                                 |                                     |               |                  |              |
| Systolic blood pressure (mm Hg)      | 0.38 (2.46) <sup>abc</sup>         | -3.50 (2.19) <sup>ad</sup>     | -2.06 (2.10) <sup>bc</sup>      | -6.47 (3.34) <sup>cde</sup>         | <b>28.651</b> | <b>&lt;0.001</b> | <b>0.593</b> |
| Diastolic blood pressure (mm Hg)     | 1.08 (2.62) <sup>abc</sup>         | -1.56 (1.90) <sup>ad</sup>     | -1.17 (1.92) <sup>bc</sup>      | -4.35 (3.20) <sup>cde</sup>         | <b>17.840</b> | <b>&lt;0.001</b> | <b>0.476</b> |
| Mean blood pressure (mm Hg)          | 0.73 (2.41) <sup>abc</sup>         | -2.53 (1.82) <sup>ad</sup>     | -1.61 (1.81) <sup>bc</sup>      | -5.41 (3.14) <sup>cde</sup>         | <b>27.422</b> | <b>&lt;0.001</b> | <b>0.582</b> |
| <i>Glucose metabolism</i>            |                                    |                                |                                 |                                     |               |                  |              |
| Plasma glucose (mg/dL)               | -1.00 (7.26) <sup>abc</sup>        | -2.06 (8.12) <sup>a</sup>      | 0.50 (5.53) <sup>b</sup>        | -4.05 (6.28) <sup>c</sup>           | 0.558         | 0.644            | 0.025        |
| Plasma insulin (UI/mL)               | 1.70 (2.55) <sup>abc</sup>         | -1.37 (3.01) <sup>a</sup>      | -1.37 (2.54) <sup>b</sup>       | -1.88 (2.05) <sup>c</sup>           | <b>7.434</b>  | <b>&lt;0.001</b> | <b>0.253</b> |
| Insulin glucose ratio                | 3.25 (4.70) <sup>abc</sup>         | -1.98 (5.14) <sup>a</sup>      | -2.30 (4.27) <sup>b</sup>       | -1.87 (3.11) <sup>c</sup>           | <b>6.642</b>  | <b>0.001</b>     | <b>0.232</b> |
| <i>Lipid metabolism</i>              |                                    |                                |                                 |                                     |               |                  |              |
| Total cholesterol (mg/dL)            | 6.13 (38.33)                       | -1.00 (19.49)                  | -3.13 (36.54)                   | -15.32 (12.17) <sup>b</sup>         | 2.230         | 0.093            | 0.097        |
| HDL-C (mg/dL)                        | -0.67 (11.88)                      | 4.71 (10.95)                   | 5.12 (12.92)                    | 2.21 (12.82)                        | 0.536         | 0.660            | 0.025        |
| LDL-C (mg/dL)                        | 3.60 (35.82) <sup>a</sup>          | 4.24 (21.14)                   | 4.56 (28.84) <sup>b</sup>       | -18.05 (18.88) <sup>ab</sup>        | <b>3.562</b>  | <b>0.019</b>     | <b>0.147</b> |
| Triglycerides (mg/dL)                | 3.27 (57.83)                       | -26.71 (60.07)                 | -15.44 (60.41)                  | -30.42 (41.10)                      | 1.387         | 0.255            | 0.063        |
| LDL-C/HDL-C                          | 0.01 (1.13)                        | -0.14 (0.57)                   | -0.10 (0.75)                    | -0.33 (0.55)                        | 0.920         | 0.436            | 0.043        |
| Triglycerides/HDL-C                  | -0.03 (1.38)                       | -0.76 (1.55)                   | -0.39 (1.37)                    | -0.53 (1.08)                        | 0.929         | 0.432            | 0.043        |
| <i>Liver function</i>                |                                    |                                |                                 |                                     |               |                  |              |
| ALT (IU/L)                           | 0.41 (7.35)                        | -0.53 (6.77)                   | 2.88 (6.68)                     | 0.79 (8.72)                         | 0.757         | 0.633            | 0.025        |
| $\gamma$ -GT (IU/L)                  | -1.94 (5.54)                       | -2.82 (7.88)                   | 0.22 (4.84)                     | -0.53 (10.17)                       | 0.754         | 0.524            | 0.033        |
| Fatty liver index                    | -3.07 (7.01)                       | -8.71 (12.25)                  | -7.64 (9.00)                    | -10.10 (10.27)                      | 1.214         | 0.338            | 0.051        |

P value for ANCOVA adjusting for baseline, with post hoc Bonferroni-corrected t test (same letters indicate significant differences).

Abbreviations: PAR - physical activity recommendations group; HIIT - high intensity interval training group; HIIT+EMS - whole-body electromyostimulation group; ALT - Alanine transaminase;  $\gamma$ -GT -  $\gamma$ -glutamyl transferase. P value for one way ANOVA to detect differences between groups at baseline.
